# Supplementary material for: Zebrafish Models of Autosomal Recessive Ataxias
Source: Cells. 2021 Apr 8;10(4):836. doi: 10.3390/cells10040836 (PMC8068028; doi:10.3390/cells10040836)
Supplement: Supplementary file 1 [file cells-10-00836-s001.xlsx]

## Sheet: Recessive ataxias
Disease /gene	Zebrafish gene (% homology)	Model	Survival and early development	Morphological phenotype	Neural phenotype	Histopathology and metabolism	Genetics and proteomics	Behaviour	Model verification	Treatment	Reference
AT / ATM	atm (54%)	atm splice block morpholino	Morphants with a radiation dose of 8Gy: abnormal development with retardation and died at 72hpf (radiosensibility)	Normal development. With a radiation dose of 8Gy: no pigmentation, lack of yolk extension, and extreme ventral body curvature	-	-	-	-	Radiated control morpholino didn´t developed phenotype, RT-qPCR	-	[55]
		atm knock out	-	Developed exclusivelly as infertile males. Crossing with p53 mutants rescued the all male phenotype but not infertility and produced quick tumor formation	-	-	-	-	Coinjection p53 morpholino	-	[56]
Boucher-Neuhäuser syndrome, SPG39 / PNPLA6	pnpla6 (70%)	pnpla6 translation block morpholino	-	Curly tail, shorter head tail distance, smaller eyes with abnormal development and reduced otic vesicle size, midbrain-hindbrain boundary defect, swelling of the pericardium, reduced heart rate and reduced blood flow	Fewer motor neurons and spinal motor neurons than controls, aberrant axon branching	Increasing of apoptosis mainly in CNS	-	-	Control morpholino, Human mRNA rescue, p53 morpholino coinjection	-	[58]
		2 pnpla splicing block morpholinos	-	Curly tail, shorter head tail distance, smaller eyes with abnormal development and reduced otic vesicle size	-	-	-	-	Control morpholino, human mRNA rescue. Coinjection with human mRNA with mutations of SPG39, Oliver-McFarlane syndrome or Laurence-Moon syndrome, didn’t rescue the phenotype	-	[57]
Marinesco-Sjögren syndrome / SIL1	sil1 (47%)	2 sil1 splicing block morpholinos	-	Abnormal shape and small eyes, abnormal skeletal muscle structure at 4dpf	Reduced numbers of purkinje cells	Deformed beta-dystroglycan expression at myosepta with a less clear v-shaped structure and disturbed formation of myofibers	Increase in the levels of Bip, lipidated form of LC3 and caspase 3	-	Control morpholino, mRNA rescue, RT-qPCR, western blot	-	[59]
		sil1 splicing block morpholino from Kawahara et al., 2016	-	-	-	Disruption of synapse formation along the vertical myosepta with remarkable disorganization of presynaptic branching across the muscle fibers of the myotomes	-	-	Control morpholino	-	[60]
SCAR20 / SNX14	snx14 (71%)	snx14 translation block morpholino	-	-	Loss of neural tissue volumen, reduced hindrain and less purkinje cells	Increasing in apoptosis across neural tissue, accumulation of autophagic structures	-	-	Control morpholino, Human mRNA rescue	-	[27]
		snx14 translation block morpholino (Akizu et al., 2015) and snx14 knock out ENU (sa18413)	-	No phenotype in morpholinos or knock out	No neuronal abnormalities in morpholinos or knock out	Elevated total fatty acids from neutral lipids in snx14 knock out	-	No locomotor phenotype in morpholinos or knock out	-	-	[62]
AVED / TTPA	ttpa (59%)	tppa translation block morpholinos and 2 tppa splice block morpholinos	Normal development until 12hpf	Truncated tail and brain and eye malformations at 1dpf	-	-	-	-	Control morpholino, coinjection p53 morphant	-	[63]
WFS / WFS1	wfs1a (50%) and wfs1b (54%)	wfs1b translation block and splice block morpholinos	-	-	-	Reduction in pancreatic β-islet cells and colocalization of insulin	-	-	Control morpholino, RT-qPCR, Coinjection p53 morpholino	-	[66]
		wfs1a and wfs1b splice block morpholinos, wfs1b translation block morpholino, wfs1a and wfs1b CRISPR/Cas9	Delayed development in CRISPR Cas9 models. Lower fertility in wfs1b CRISPR/Cas9	Morpholinos: Abnormal eye, brain and otoliths (wfs1b more pathological). CRISPR/Cas9: smaller otoliths	Significant reductions in neuronal development in CRISPR cas9 models, more acentuated in wfs1b. Reduced acetylcholinesterase activity in and small cerebellum in both CRISPR/Cas9 models. Reduced acetylcholinesterase activity at 12mpf in wfs1b CRISPR/Cas9	Affected mitochondrial trafficking and reduced mitocondrial complex I protein in both CRISPR/Cas9. Mitochondria respiration reduced in wfs1b CRISPR/Cas9. Lower blood glucose in wfs1b CRISPR/Cas9. Lower number of retinal ganglion cells in both CRISPR/Cas9 at 4 months	BiP protein expression upregulated in both CRISPR/Cas9 models, CHOP protein upregulated in wfs1a CRISPR/Cas9	Spontaneous movements higher in wfs1b CRISPR/cas9 at 24hpf and lower at 48hpf. Adults wfs1b CRISPR/Cas9 displayed less locomotion when were isolated (=anxiety)	Coinjection p53 morpholino, RT-qPCR	-	[67]
PHARC / ABHD12	abhd12 (67%)	abhd12 splice block morpholinos	-	-	Aberrant motor neuron axon extension, pathfinding and branching and abnormal morphology of peripheral neurons	-	-	-	-	-	[68]
		abhd12 translation block and splice block morpholinos	-	Severe microphthalmia, microcephaly, reduced head size and reduced standard body length. More severe phenotype in abhd12 translation block morpholino	Severe impaired myelination of the axonal tracks at 5dpf, affected morphology of purkinje cell layer	High reduction in the number of anterior and posterior lateral line and auditory neuromasts. Strong impairment of the retina architecture stratification, absence of lens clarification and high decrease in retinotectal projections	-	Lack of spontaneous free swimming activity at 3dpf	Coinjection p53 morpholino, control morpholino, RT-qPCR, wild type zebrafish and human mRNA rescue. Coinjection of human ABHD12 mutant mRNA associated PHARC didn´t rescue the phenotype	-	[69]
Cayman ataxia / ATCAY	atcaya and atcayb (66%)	atcay translation block and splicing block morpholinos	-	-	Reduced axon length of motor neurons, inhibited neurite outgrowth	Abnormal structures of slow and fast muscles	Chat acumulation in cell bodies of motor neurons, enlargement of the acetylcholine receptor clusters	Deteriorated escape response after touch stimulus, delayed spontaneous movement	Mouse mRNA rescue, RT-qPCR, western blot	Carbachol rescued neurite outgrowth in atcay morphant cells but not in atcay cells treated with atropine	[70]
SCAR25 / ATG5	atg5 (79%)	atg5 translation block and splice block morpholinos and atg5 mRNA overexpression	atg5 knockdown: high mortality (between 40 and 60%), atg5 overexpression: 30% of mortality and development retardation	Atg5 morpholinos: smaller and incomplete head and eyes, otoliths deformities, abnormal heart structure with less blood and congestion in the ventral common cardinal vein, body trunk, tail and yolk extension decreased and somite deficiency. Atg5 overexpression: Absence of the body pigment, small otoliths, ventralized optic vesicles, short of brain partition, insufficient differentiation of the tru…	-	-	Upregulation of mRNA levels in atg5 morpholinos and downregulated expression after atg5 overexpression. Upregulation of gli1, huC, nkx2.2, pink1, β-synuclein and zic1 in atg5 morphant embryos and downregulation of the same genes in embryos injected with atg5 mRNA overexpressed	-	Control morpholino, mRNA rescue, RT-qPCR, western blot	Rapamacyn treatment produced a similar embryo phenotype that atg5 morphant	[71]
		atg5, atg7 and becn1 translation block and splice block morpholinos	Reduced survival until 10dpf in the three morphants	The three morphants had the same phenotype: small heads and eyes, twisted body shapes and cardiac defects such as pericardial edema, defective blood flow through the heart, defective heart looping, enlarged atria, or linearized heart	-	Blocked Lc3-II conversions and increasing in apoptosis in the three morphants. Atg5 and atg7 showed significantly reduced numbers of autophagosomes at 3dpf throughout the entire heart	Misexpression mainly in the ventricle of vcan, bmp4, and notch1b in the three morphants	-	Coinjection p53 morpholino, RT-qPCR,	-	[72]
		atg5 translation block morpholino from Hu et al. 2011 and caudal fin amputation	-	-	-	Block the regeneration of caudal fin and induced the degeneration of the existing blastema in adult zebrafish which caudal fin was amputated 2 days ago. Increased apoptosis and reduced proliferation of defective fin tissues	-	-	-	-	[73]
		atg5 translation block morpholino from Hu et al. 2011 directly microinjected into the lateral rectus muscle followed by electroporation	-	-	-	Reduced regeneration of lateral rectus muscle	-	-	-	-	[74]
		MPTP parkinson disease chemical model, atg5 translation block morpholino from Hu et al. 2011	-	-	atg5 morpholino in parkinson disease model caused a further reduction of the number of dopaminergic neurons	-	β-syn, PINK1, and Parkin proteins atg5 morpholinos	atg5 morpholino in parkinson disease model worsened the locomotor behaviour	Control morpholino, RT-qPCR, western blot, atg5 mRNA overexpression in parkinson model restored the number of dopaminergic neurons at equal levels to wild type and recovered the locomotion	-	[77]
SPG76 / CAPN1	capn1a and capn1b (55%)	capn1a and capn1b translation block morpholinos	-	capn1a morphants: hydrocephalic brain, small eyes, yolk sac extension, pericardial edema, aplastic swim bladder	capn1a morphants: motor neuron disorganization, migration defects of the nV trigeminal nuclei in rhombomeres 2 and 3 and of the VII facial branchiomotor neuronal cell bodies, vagal motor neurons abnormal positioning and spacing	capn1a morphants: disruption in microtubule network in optic tectum and cerebellum and microtubules in the motor neuron axons thinner and more disorganized	-	-	Control morpholino, mRNA rescue with human CAPN1 failed because human protein was detected at 24 hpf, but not at 48 hpf, while the zebrafish protein was detected only later at 48 hpf	-	[78]
SCAR17 / CWF19L1	cwf19l1 (64%)	2 cwf19l1 splice block morfolinos	-	-	Defective cerebellar structure	-	-	Reduced locomotion and abnormal touch-evoked escape response at 3dpf	Control morpholino, RT-qPCR	-	[35]
East syndrome / KCNJ10	kcnj10a (65%) and kcnj10b (68%)	Kcnj10a translation block and splice block morpholinos and Kcnj10b splice block morpholinos	-	kcnj10a: normal general phenotype, dilated pronephric duct and pericardial edemas caused by water retention. kcnj10b: small size and morphological abnormalities	kcnj10a: no defects in central or peripheral nervous system	-	-	kcnj10a: increase in frequency of spontaneous contractions at 30hpf, defective touch-evoked escape response , abnormal locomotion and abnormal movements of eye and jaw. Kcnj10b: locomotion imposible to analyze due to the severe phenotype	Control morpholino, human mRNA rescue, p53 morpholino coinjection, RT-qPCR	-	[37]
		kcnj10a translation block and splice block morpholinos from Mahmood et al., 2013	-	-	-	-	-	Epilepsy at 120hpf	-	Pentobarbitone rescued the epilepsy but diazepam not	[79]
		kcnj10a splice block morpholino from Mahmood et al., 2013 and mRNA overexpression of one mutation for autism-epilepsy phenotype	-	-	-	-	-	Overexpression of one mutation for autism-epilepsy phenotype caused the same locomotor phenotype than morpholinos	Human mRNA rescue. mRNA from patients with KCNJ10 mutations for autism spectrum disorder and epilepsy, didn’t rescue the phenotype	-	[80]
Poretti-Boltshauser syndrome / LAMA1	lama1 (52%)	lama1 knock out ENU (baluw)	-	-	-	Defects in retinal ganglion cell axons guidance, including aberrant ipsilateral and anterior projections	-	-	-	-	[82]
		lama1 knock out ENU (baluw) from Karlstrom et al., 1996	-	-	Defects in the guidance of neurons of the bilateral nuclei and fasciculus neurons of the medial longitudinal nuclei. Aberrant trajectories of reticulospinal axons. Pathfinding defects of Mauthner axon. Multiple axon guidance errors and increased branching of spinal motor neurons.Failed migration of branchiomotor neurons	Anterior commissure not properly formed. Increased apoptosis in the forebrain	Expression analysis of axon guidance genes was not altered	-	-	-	[83]
		lama1 knock out ENU (balm190)and lama1 translation block and splice block morpholinos	Anterior notochord failed to differentiated in mutants and morphants	-	-	-	Mutants had reduced levels of laminin 1 immunoreactivity surrounding the abnormal anterior notochord and severely reduced laminin 1 immunoreactivity in all vertical myosepta	-	-	-	[84]
		lama1 knock out ENU (a69) and lama1 translation block morpholino from Zinkevich et al., 2006	All embryos died before 12dpf	Ocular phenotype with irregularly shaped pupil, shortened body axis. Lama1 mutants adult chimeras: severe dysplasias, microphthalmia, cataracts, lens dysmorphogenesis, small irregular pupils, disrupted scleral iridophore patterning, and iridocorneal dysgenesis	In the morphants: multiple axonal projection defects within the eye	Defects in lens development at 30hpf: with disrupted epithelial cell morphogenesis and association of the membrane blister with the lens capsule. Apoptosis in the lens at 36hpf, delayed fiber cell morphogenesis and retinal lamination and dysplastic cornea. Mispositioned photoreceptor cells in the inner retina. Morphants: delayed endothelial cell differentiation and severe dysmorphogenesis of the …	-	-	RT-qPCR	-	[85]
		2 lama1 translation block morpholinos	-	Shortened body, abnormal body axis curvature, and malformed eyes that often lacked lenses and had misshapen pupils started at 36hpf	-	Reduced eyes size, lens degradation with lenticular bladder cells formed a deposit in subretinal space and corneal thickening at 72dpf	-	-	Control morpholino,	-	[81]
		lama1 knock out ENU (tp82)	-	-	-	-	-	Reduced optokinetic response at 5dpf	-	-	[86]
		lama2 knock out ENU (teg15a) with injection of lama1 morpholino from Pollard et al., 2006	-	-	-	Complete loss of laminin immunoreactivity within the myotome, high number of detached fibers and reduced muscular birefringence	-	-	-	-	[87]
		lama1 knock out ENU(uw1) from Karlstrom et al., 1996	Disrupted morphogenesis of the optic cup at 12,5hpf. Disrupted cell polarity during optic vesicle evagination	-	Connection between brain and optic cup failed to compress	Rounder and more symmetric optic vesicle along the anterior-posterior axis, disorganized retina, ovoid lens. Reduced focal adhesion recruitment at optic stalk furrow. Apoptosis in medial regions of the optic cup	-	-	p53 morpholino coinjection	-	[88]
MIRAS / POLG	polg (66%)	3 polg knock out TALEN	-	Small and thinny size and small eyes	-	Deficient fin regeneration after amputation at 2 weeks post fecundation. Respiratory basal levels of mutant polg larvae at 3 weeks post fecundation were reduced at CNS with low respiratory output	Reduced mtDNA levels. Reduced levels of Vdac1, ATP levels and static lactate levels were normal. Inability to induce mtDNA replication	-	RT-qPCR, western blot	-	[89]
		polg Translation block and splice block morpholinos, polg knock out ENU (sa9574) and polg CRISPR/Cas9 (ia302)	polg CRISPR/ Cas9 line did not survive until adulthood	Morpholinos: Reduced length, enlargement of the cardiac atrium. CRISPR/Cas9: Reduced length and early defects in skelletal muscle. ENU: Dilated heart and reduction of the trabecular network and its thickness. Alteration in follicle maturation and smaller testes with reduced sperm levels. Reduced liver and skeletal muscle defects.	-	Morpholinos: Fused mitochondrial with swollen morphology. Alteration of pathways involved in mitochondria-nucleus retrograde signalling (CREB and Hypoxia pathways). CRISPR/Cas9 and ENU: Alteration of mitochondria-nucleus retrograde signalling. ENU: Altered mitochondrial distribution and reduced mitochondrial mass. Decreased oxygen consumption rate and mitochondrial superoxide production	ENU: reduced mtDNA levels and reduced expression of nqo1 and txnrd3 (reactive oxygen species induced genes)	Morpholinos: Increased heart rate. CRISPR/Cas9: Altered responsiveness to light stimuli at 15dpf	RT-qPCR	Clofilium tosylate efficiently rescued mtDNA levels, complex I respiratory activity, mitochondrial mass and skeletal muscle defects in ENU mutants and cardiac defects in morpholinos	[90]
PACA / PTF1a	ptf1a (63%)	2 ptf1a translation block morpholinos	-	-	.	Lack of exocrine pancreas at 80hpf. Reduced number of anterior endocrine cells which are located into exocrine pancreatic parenchyma	-	-	Control morpholino	-	[92]
		2 ptf1a translation block morpholinos	-	No morphological phenotype	-	Lack of differentiated exocrine cells	Reduced trypsin expression, but not affected the expression of insulin glucagon and somatostatina	-	-	-	[91]
		ptf1a knock out ENU (akreass466) and ptf1a translation block morpholino	-	-	-	Delayed ventral pancreas specification, loss of exocrine cells and increase in ectopic endocrine cells	-	-	-	-	[93]
		2 ptf1a translation block morpholinos (Lin et al., 2004; Zecchin et al., 2004)	-	-	-	Reduction in the number of cells from horizontal and amacrine cell layers because they changed their inhibitory neuron fate into excitatory cell types	-	-	-	-	[94]
		BAC TOL2 transgenic ptf1a line and ptf1a:egfpjh transgenic line	-	-	-	-	Transcription factors and enhancers regulate activation of Ptf1a expression in the developing pancreas, hindbrain, spinal cord, retina and cerebellum expression	-	-	-	[96]
		ptf1a translation block morpholino injected in ptf1a knock out ENU	-	-	-	Total lack of amacrine cells	-	-	Coinjection p53 morpholino	-	[95]
Gordon Holmes syndrome / RNF216	rnf216 (46%)	rnf216 splice block morpholino and otud4 splice block morpholino	-	Slight reduction in head size	rnf216 morphant: Reduction in the size of the eye cup and optic tecta and disorganization of the cerebellum. Coinjection of both morphants produced more severe cerebellar phenotype with increased reduction in the size of optic tecta and marked microphthalmia	-	-	-	Human mRNA rescue but not rescued with human mRNA with mutations in RNF216 or OTUD4	-	[42]
NADGP / SQSTM1	sqstm1 (58%)	sqstm1 translation block and splice block morpholinos	-	-	Disrupted arborization and shortening of the motor neuron axons	-	Increased levels of mTOR	Reduced touch-evoked escape response	RT-qPCR, human mRNA rescue but not ALS/FTD human SQSTM1 mRNA. Overexpression of wild type and mutant human mRNAs didn’t reproduce the morphant phenotype	Rapamycin ameliorate the motor phenotype	[97]
		sqstm1 splice block morpholino	-	-	Structural cerebellar defects in 60% of the embryos (from depletion of the axonal connections across the midline of the cerebellum to complete atrophy)	-	-	-	Human mRNA rescue but not mutant human mRNA	-	[43]
SCAR7 or CLN2 / TPP1	tpp1 (60%)	2 tpp1 transcription block morpholinos	Severe developmental defects at 28hpf	Abnormal head at 28hpf, curly tails and cardiovascular defects at 52hpf	-	Increased apoptosis throughout the body	-	-	Western blot	-	[98]
		tpp1 knock out ENU (sa0011) and tpp1 translation block and splice block morpholinos	tpp1 mutants died at 7dpf	In morphants and mutants: curved body, reduced head and small retina at 48hpf. No jaw at 72hpf. Swim bladder no detectable	Absence of HuC/ D-positive differentiated neurons in retina, optic tectum and cerebellum of mutants and morphants. Axonal disorganization at 48hpf in morphants and mutants	Increased stored levels of subunit c of mitochondrial ATP synthase in lysosomes in the whole body of mutants. Increased apoptosis in mutants. Reduced proliferative cells at 48hpf in retina, forebrain, midbrain-hindbrain boundary and spinal cord of mutants and morphants	-	Aberrant swimming pattern with many turns, significantly increased hyperactive covering long distances in mutants at 72hpf. At 96hpf mutants displayed sustained muscle contractions and lost the ability to move. Reduced touch-evoked escape response in mutants	Western blot	-	[99]
		tpp1 knock out ENU (sa0011) from Mahmood et al., 2013	-	-	-	-	-	Seizures activity	-	Treatment with valproate reduces seizure-related movement and reduced the mortality between 3-6dpf. Treatment with pentobarbitone didn't ameliorate the phenotype	[100]
SCAR24 / UBA5	uba5 (79%)	uba5 splicing block morpholino	-	No morphological phenotype	-	-	-	Reduced movements and difficulties to exit the chorion. Reduced touch-escape response with looping or pinwheel swimming. Spontaneous motility at 5dpf was severely affected	Control morpholino	-	[101]
Galloway-Mowat syndrome / WDR73	wdr73(35%)	wdr73 translation block morpholino	-	Reduced head size, brain morphology defects, hypopigmentation which displayed incomplete penetrance and curved body or truncated tail region at 1-2dpf	Poorly expanded and differentiated midbrain at 48hpf. Dilated midbrain and hindbrain ventricles. Absent purkinje cells at 4dpf	Reduced proliferation of H3 mitotic progenitor cells at 1dpf	Lack of dmbx1a expression in the cerebellum. Not variable expression of fgf8	-	Western blot, human and zebrafish mRNA rescue. Coinjection with human nonsense mutation of Galloway-Mowat mRNA didn’t rescue the phenotype	-	[46]
SCAR12 / WWOX	wwox (72%)	wwox translation block morpholino and siRNA	Lethality	Severe edemas, curled backbones, reduced body length, head, and eye size	-	Altered Ca2+ dynamics	-	-	mRNA rescue	-	[102]
NPC / NPC1	npc1 (67%)	npc1 translation block and splicing block morpholinos	Reduced progression of epiboly. Died before 2dpf	Shorter body axis, wider notochord and somites	-	Actin cytoskeleton disorganization with actin clumping and localized loss of the actin microfilaments in other cells. increased cell death at 1dpf. Punctate sterol distribution in cells at 12hpf	-	-	Mouse mRNA rescue, coinjection with p53 morpholino, RT-qPCR	Treatment with pregnenolone and Dex partially rescues epiboly delay and actin cytoskeleton defects	[103]
		npc1 translation block morpholino	-	Malformed heads and dysmorphic brains and eyes	-	82% of the embryos had almost a complete absence of thrombocytes in the caudal hematopoietic tissue at 3dpf. Significant reduction of erythrocytes	-	-	RT-qPCR	-	[104]
		npc1 CRISPR Cas 9	Reduced lifespan most of them died 2mpf and none of them survived 8mpf	Reduced body length	Loss of purkinje cells	Macroscopic hepatomegaly and splenomegaly. Lipid accumulation in the livers. Massive accumulation of cholesterol in hepatocytes. Significant differences in lipid profile analysis of ceramide, diacylglycerol, lysophosphatidic acid, phosphatidic acid, phosphatidylcholine, phosphatidyl ethanolamine, phosphatidyl serine and triglyceride	-	Ataxia symptoms	RT-qPCR	-	[105]
		2 npc1 CRISPR Cas 9 (npc1y535 y npc1hg37)	Reduced lifespan, died before 6mpf. Infertility.	Reduced body length	Axonal spheroids in the hindbrain and disorganized Purkinje neurons in the cerebellum	Larger hepatocytes full of vacuole like structures at 7dpf, cholesterol accumulation started at 2dpf. Increase of endolysosomal compartment at 5dpf	-	Adults fail to maintain an upright position during swimming and after that died within a few days	Western blot, cDNA rescue	Reduced accumulation of cholesterol with treatment with 2HPβCD compound but it didn’t rescue the liver defect or improve the survival	[106]
CAMRQ3 / CA8	ca8 (79%)	ca8 translation block and splice block morpholinos	-	Defects in the head, fragile body, curved tail, small eye size, pericardial edema at 1dpf. Shortened tail, curved body axis, absence of swim bladder and otoliths vesicles	Gross morphologic changes in cerebellar region and reduction in the size of the cerebellum	Abnormal muscle development. Apoptosis in head region and periphery of tail region	-	Altered swimming pattern with slow swim, increased turning angle and most of them swam along the periphery of the Petri dish, pronounced difficulty in balancing the body while swimming	Coinjection of p53 morpholino, control morpholino, RT-qPCR, western blot	-	[52]
		ca8 translation block morpholinos	Developmental delay, lethality	Heart edema and shorter trunk	Cranial motor neurons, Rohon Beard sensory neurons and spinal motor neurons develop normal	-	-	Reduction in touch evoked response	Coinjection of p53 morpholino, control morpholino,	-	[107]
Joubert syndrome / AHI1	ahi1 (41%)	ahi1 splice block and translation block morpholinos	-	Abnormalities in: eye, hindbrain (hydrocephalus) and otoliths development. Defects in cyst formation in the pronephric kidney tubules	-	Defects in lamination of the cell layers of the retina. Reversed cardiac looping with the heart in a L-loop pattern. Cloacal dilatation and loss of pronephric cilia in epithelium of the pronephric ducts	-	-	Murine mRNA rescue, coinjection of p53 morpholino, control morpholino, RT-qPCR	-	[115]
		ahi1 TALEN model	-	-	-	Cone degeneration, rhodopsin mislocalization in rod photoreceptors and absence of distal pronephric duct cilia at 5 mpf	-	-	Human mRNA rescue	-	[116]
		ahi1 splice block morpholino from Simms et al., 2012 and ahi1 CRISPR Cas9	-	-	-	Morphants and mutants had retinal ganglion cell axon misprojection and ocular dysplasia caused by a toxic gain of function	-	-	Control morpholino, RT-qPCR	-	[117]
Joubert syndrome / CEP290	cep290 (58%)	cep290 translation block and splice block morpholinos	Defects in development of retinal, cerebellar and otic cavity	Cyst formation in the pronephric kidney tubules, lack of some retinal tissue	Developmental defects of the nervous system	No defects in cilia length or motility	-	-	Control morpholino	-	[118]
		cep290 splice block morpholino from Sayer et al., 2006	-	Abnormal body curvature, hydrocephalus, pronephric cysts and eye defects	-	-	-	-	-	-	[119]
		cep290 translation block and splice block morpholinos	-	Curved body, cidney cists and severe cardiac edema	-	-	-	-	Control morpholino, RT-qPCR	Rapamycin rescue the kidney defect. Roscovitine ameliorate the renal phenotype and cardiac edema	[120]
		cep290 knock out ENU (fh297)	-	Scoliosis, progressive cone deterioration	-	-	-	-	RT-qPCR	-	[114]
Joubert syndrome / CSPP1	cspp1a (30%)and cspp1b (20%)	2 cspp1a splice block morpholinos and cspp1b splice block morpholino	-	Curved body shape, dilated ventricles, hydrocephalus, pronephric cysts and craniofacial cartilage defects at 3dpf	-	No cilia defects	-	-	Control morpholinos	-	[123]
Joubert syndrome / CEP104	cep104 (50%)	cep104 translation block and splice block morpholinos, cep104 CRISPR Cas9	-	Pericardial edema, abnormal cardiac looping, mild tail curvature and microphthalmia at 48hpf	Loss of neuronal structure, loss of oculomotor neurons	Ciliary defects in kupffer’s vesicle	-	-	Human mRNA rescue, RT-qPCR, western blot	-	[126]
Joubert syndrome / KIAA0556	kiaa0556 (24%)	kiaa0556 translation block and splice block morpholinos	-	Curly tails, small head size and perithoracic and abdominal edema	-	-	-	-	Human mRNA rescue	-	[125]
Joubert syndrome / POC1B	poc1b (67%)	poc1b translation block and splice block morpholinos	Delayed body development	Small eyes, small body, small head and small brain, curved tail, heart defects and abnormal kupffer's vesicle	-	Lack of lamination and neuronal organization in the retina, abnormal photoreceptor development	-	Impaired visual function	Control morpholino, RT-qPCR, human mRNA rescue	-	[124]
Pontocerebellar hypoplasia / TSEN54	tsen54 (40%)	tsen54 translation block and splice block morpholinos and tsen54 knock out ENU (hu5985)	Reduced survival of mutants before 9dpf	-	Brain hypoplasia and loss of structural integrity inside the brain with an aberrant midhindbrain boundary in morpholinos	Increased apoptosis in the brain in morpholinos	fgf8 and otx2 expression at 24hpf was normal in morpholinos	-	Control morpholino, RT-qPCR, human mRNA rescue partially rescued the brain phenotype in morpholinos	-	[127]
Pontocerebellar hypoplasia / SLC25A46	slc25a46 (71%)	slc25a46 splice block morpholino	-	Curly-tail morphology	Motor neurons had shorter axon tracts many of which failed to innervate the rostral myotome at 48hpf, spinal cord neuropil had fewer neuronal processes, less retinal ganglion cells axons that reached the tectum at 72 hpf and affected retinal ganglion cells axons dendrites. Degeneration of motor neuron terminals	Mislocation of the mitochondria which are in process of fission within the cell bodies.	-	Abnormal locomotion	-	-	[130]
		slc25a46 translation block and splicing block morpholinos	Failure of the development of midbrain and hindbrain	-	Loss of spinal motor neurons	Longer mitochondrias. Overespression of human wild type mRNA produced mitochondrial fragmentation and disruption of the mitochondrial network	-	-	Control morpholino, human mRNA rescued the size of the mitochondrias but not mutant SLC25A46 mRNA	-	[129]
		slc25a46 CRISPR/Cas9	-	No phenotype in homozygous F2 generation but F0 mosaics had smaller eyes, heart edema, shorter trunk and increase of motor neuron axon disruptions	-	-	In F2 homozygous embryos: high number of serine proteases and their transcription factors, serine protease inhibitors, DNA-binding proteins and a smaller number of transporters, immunity, and other proteins that were expressed differentially	-	Human mRNA rescue of F0 injected embryos. RT-qPCR didn´t show downregulation of slc25a46 probably due to truncated protein was quickly degraded due to its conformational instability	-	[131]
